# Supplementary material
Source: Springer Nature journal article supplement (https://www.springermedizin.de/resource/supplementary/12943_2013_1223_MOESM8_ESM.pdf/9552382)

**A**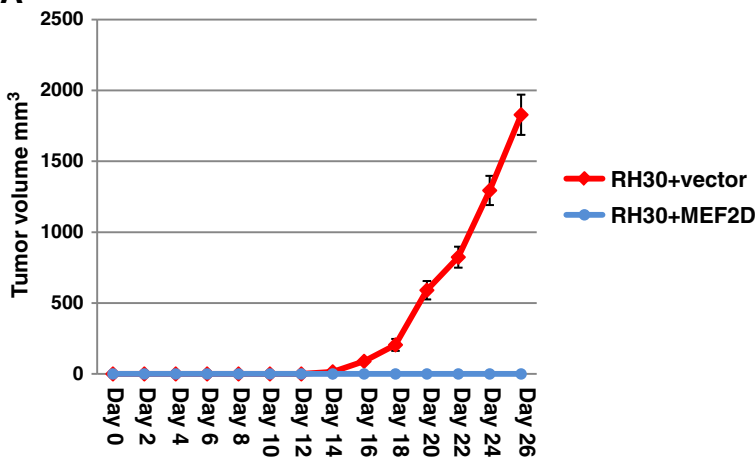**B**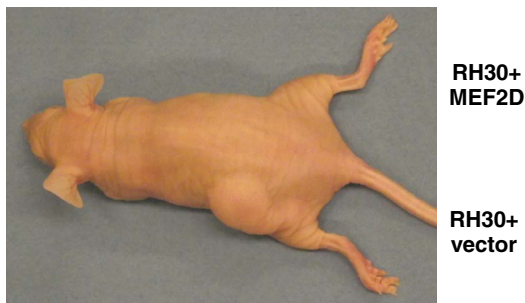**C**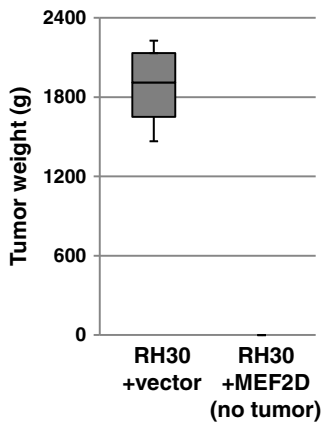

Supplement: MOESM8 [file 9552382]
